# Supplementary material for: Perfluorooctane sulfonate induces apoptosis of hippocampal neurons in rat offspring associated with calcium overload
Source: Royal Society of Chemistry journal article supplement (doi:10.1039/c4tx00177j), 2015-01-01
Supplement: c4tx00177j1.pdf [file c4tx00177j1.pdf]

Table S1

Mean ( $\pm$ SE) PFOS concentration in control and PFOS treated groups in serum of maternal female rats ( $\mu\text{g/ml}$ ).  
N=3.

| Postnatal<br>Days | Groups          |                  |                    |
|-------------------|-----------------|------------------|--------------------|
|                   | 0               | 5                | 15                 |
| PND7              | nd <sup>a</sup> | 25.7 $\pm$ 0.8** | 99.3 $\pm$ 2.0**   |
| PND35             | nd              | 64.3 $\pm$ 9.5** | 207.7 $\pm$ 10.5** |

\* Statistically significant ( $p < 0.05$ ), \*\* Statistically significant ( $p < 0.01$ ).

a: nd means not detectable.

Table S2

Mean ( $\pm$ SE) PFOS concentration in control and PFOS treated groups in hippocampus of maternal female rats  
( $\mu\text{g/g}$ ). N=3.

| Postnatal<br>Days | Groups          |                |                  |
|-------------------|-----------------|----------------|------------------|
|                   | 0               | 5              | 15               |
| PND7              | nd <sup>a</sup> | 3.1 $\pm$ 0.7  | 13.5 $\pm$ 2.9** |
| PND35             | nd              | 7.3 $\pm$ 0.9* | 22.7 $\pm$ 4.4** |

\* Statistically significant ( $p < 0.05$ ), \*\* Statistically significant ( $p < 0.01$ ).

a: nd means not detectable.
